# Supplementary material for: Identification of aberrant circulating miRNAs in Parkinson's disease plasma samples
Source: PubMed Central journal article supplement (PMC5893342; doi:10.1002/brb3.941), 2018-02-19

Supplemental Figure 1: Quality control of small RNA from plasma samples of normal control using Agilent 2100 bioanalyzer

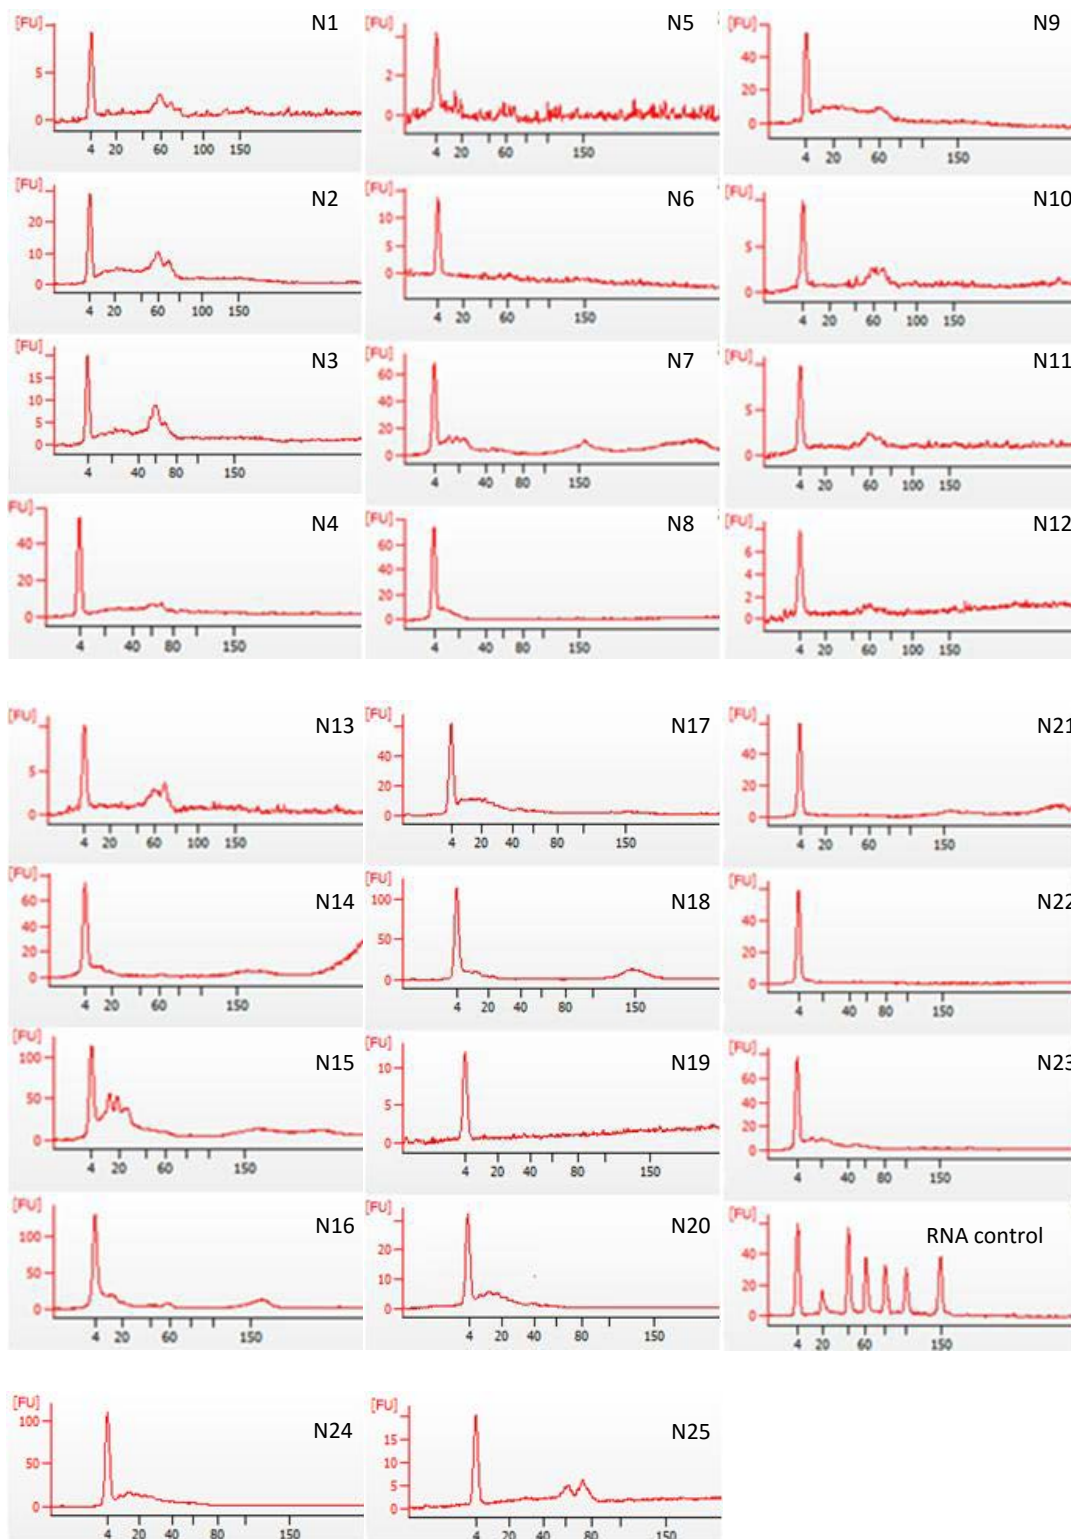

Supplemental Figure 2: Quality control of small RNA from plasma samples of PD patients using Agilent 2100 bioanalyzer

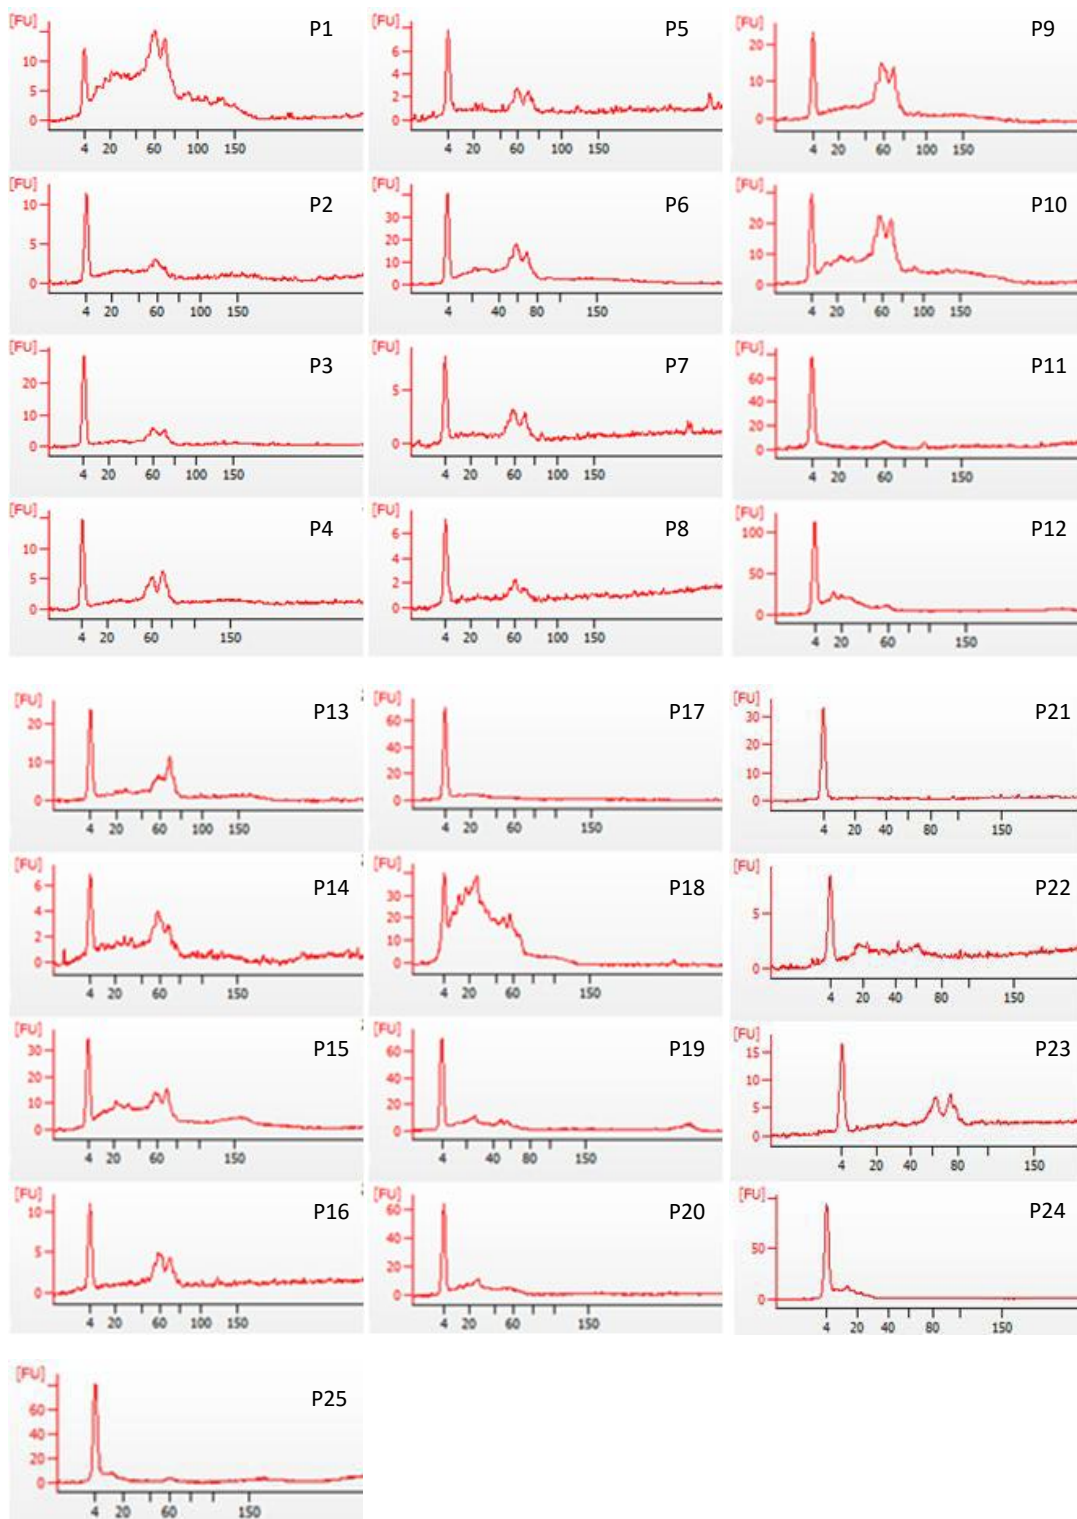

Supplement: BRB3-8-e00941-s001.pdf [file BRB3-8-e00941-s001.pdf]
